# Supplementary material for: Electrodeposited cobalt sulfide on a vertical graphene nanocomposite for high-performance supercapacitors
Source: Royal Society of Chemistry journal article supplement (doi:10.1039/d1nj03777c), 2021-01-01
Supplement: d1nj03777c1.pdf [file d1nj03777c1.pdf]

Electronic Supplementary Material (ESI) for New Journal of Chemistry.  
This journal is © The Royal Society of Chemistry and the Centre National de la Recherche Scientifique 2021

## **Supplementary Information**

### **Electrodeposited cobalt sulfide on vertical graphene nanocomposite for high-performance supercapacitors**

Jiajun Fan,<sup>a</sup> Long Hu,<sup>a</sup> Zhenjun Qi,<sup>a</sup> Tao Wan,<sup>\*a</sup> Shihao Huang,<sup>a</sup> Xiao Zhang,<sup>a</sup> Zhaojun Han,<sup>\*bc</sup> Dewei Chu<sup>a</sup>

<sup>a</sup> School of Materials Science and Engineering, University of New South Wales, Sydney 2052, Australia. E-mail:

tao.wan@unsw.edu.au

<sup>b</sup> School of Chemical Engineering, The University of New South Wales, Sydney, NSW 2052, Australia. E-mail:

zhaojun.han@unsw.edu.au.

<sup>c</sup> CSIRO Manufacturing, 36 Bradfield Road, Lindfield, NSW 2070, Australia

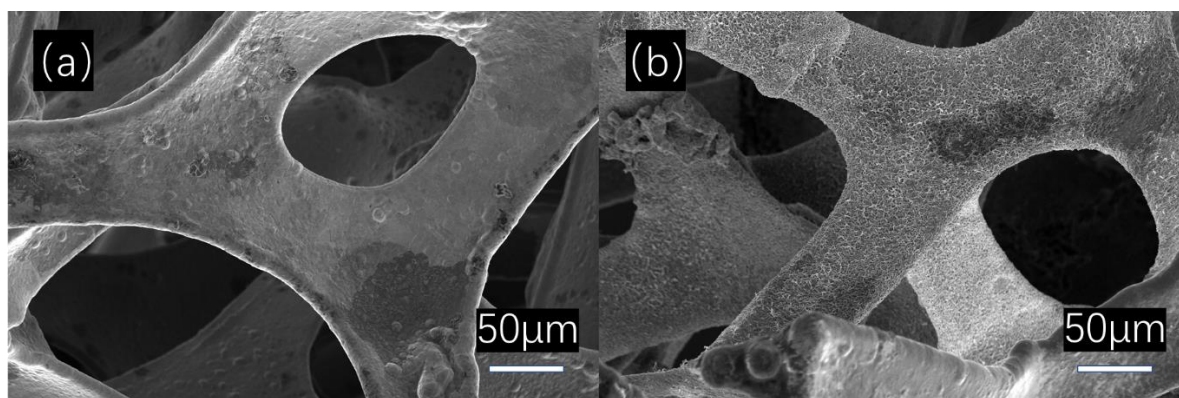

Figure S1 Low magnification SEM images (a) porous nickel foam; (b) CoS/VG deposited nickel foam.

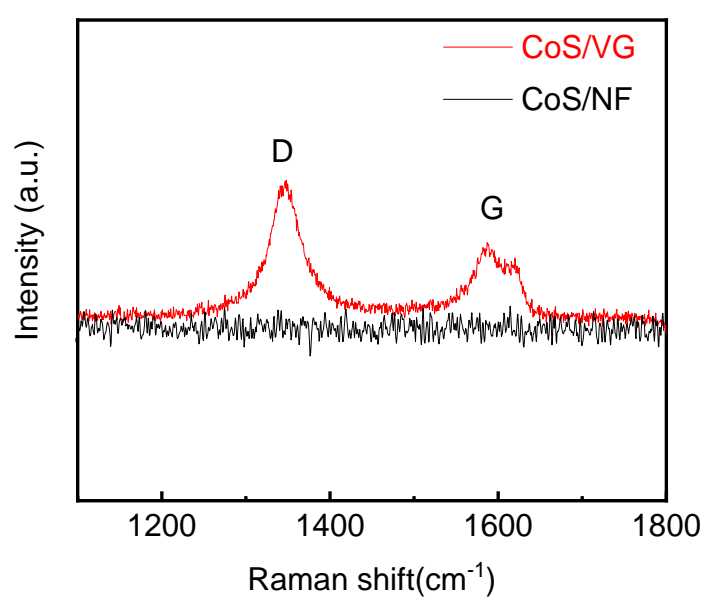

Figure S2 Raman spectra of CoS/VG and CoS/NF electrodes.

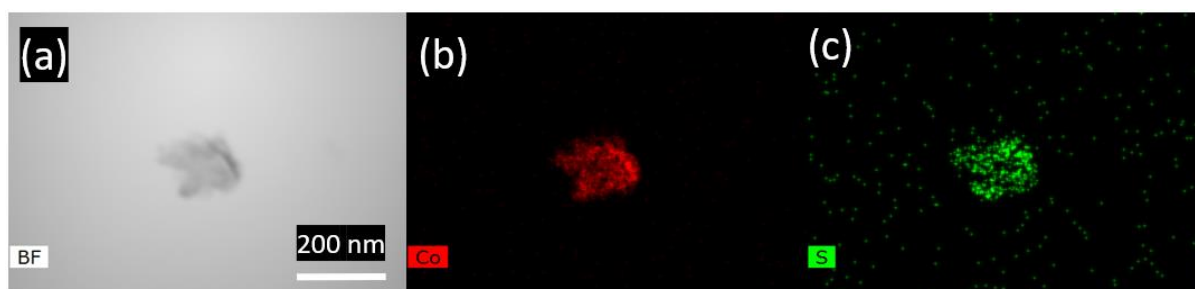

Figure S3 Energy-dispersive X-ray spectroscopy (EDS) elemental mapping (a) CoS/VG bright-field (BF) images and (b, c) element mapping of cobalt and sulfide.

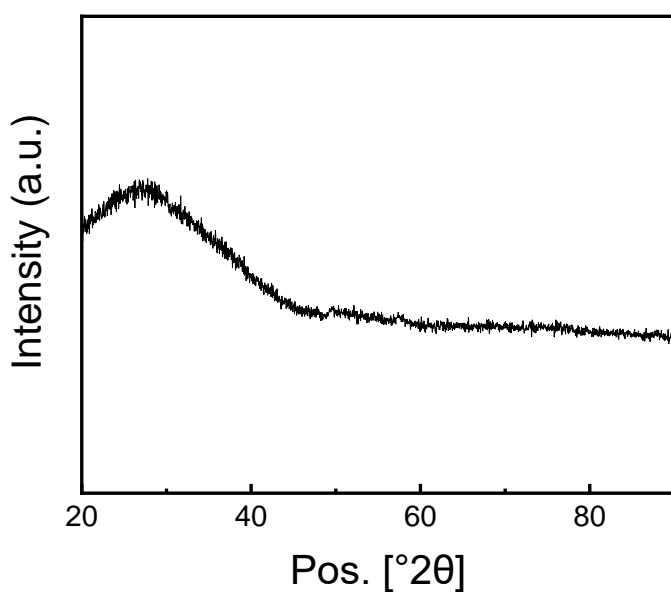

Figure S4 XRD patterns for CoS/VG scratched from NF on the glass.

| Name              | Area (Peaks) | Atomic % |
|-------------------|--------------|----------|
| C1s               | 9577.43      | 30.14    |
| O1s               | 31965.18     | 35.96    |
| S2p <sub>3</sub>  | 1931.34      | 4.83     |
| N1s               | 8287.99      | 15.74    |
| Co2p <sub>3</sub> | 25636.77     | 7.29     |
| Ni2p <sub>3</sub> | 24368.92     | 6.02     |

Table S1 Atomic ratio from XPS survey of CoS/VG/NF

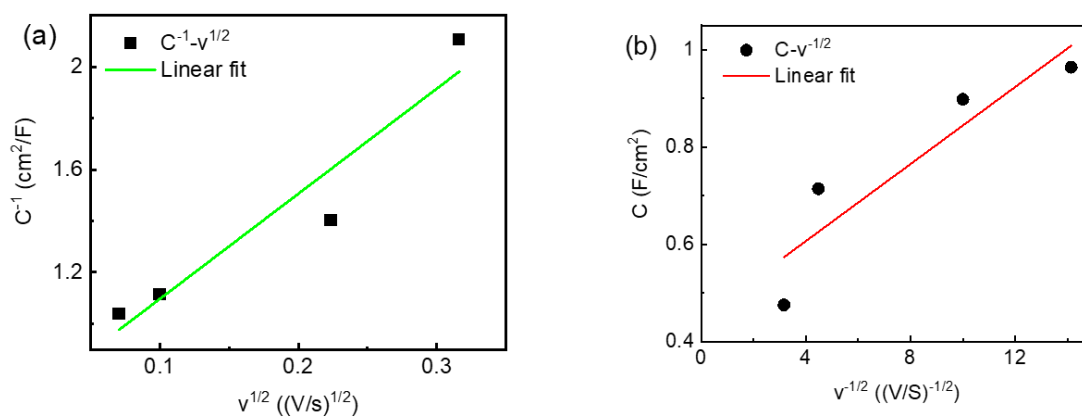

Figure S5 Linear fit of (a) the reciprocal of the areal capacitance and the square root of scan rate; (b) the areal capacitance and the reciprocal of square root of scan rate.

During the cyclic voltammetry experiments, the interface between CoS/VG electrode and liquid electrolyte appeared double-layer capacitance. To demonstrate the contribution of double layer capacitance and faraday capacitance, the capacitance can be evaluated by Trisatti method as followed.<sup>1</sup>

The data is collected from different scan rate and the corresponding areal capacitance is evaluated based on:  $C = \frac{S}{2 \cdot \Delta U \cdot v}$ , where C is the areal capacitance, S is the enclosed area corresponding cyclic voltammograms (in  $A \cdot V / cm^2$ ),

$\Delta U$  is the potential window (in V), and  $v$  is the scan rate (in V/s). If the ion diffusion follows a semi-infinite diffusion pattern, the reciprocal of the calculated areal capacitance ( $C^{-1}$ ) is linearly correlated with the square root of scan rates ( $v^{1/2}$ ), as shown in the following equation:

$$C^{-1} = \text{Constant} \cdot v^{1/2} + C_{\tau}^{-1}$$

Where  $C$ ,  $v$  and  $C_{\tau}$  are calculated areal capacitance, scan rate and maximum areal capacitance, respectively. The “maximum areal capacitance ( $C_{\tau}$ )” is the sum of double layer capacitance and faraday capacitance.  $C_{\tau}$  equals to the reciprocal of the y-intercept of the  $C^{-1}$ - $v^{1/2}$  (figure S5 (a)), which is 0.6867 F/cm<sup>2</sup>.

The double layer capacitance ( $C_d$ ) can be calculated by Trisatti method. The calculated areal capacitance ( $C$ ) is linearly correlated with the reciprocal of square root of scan rate ( $v^{-1/2}$ ), as shown in the following equation:

$$C = \text{Constant} \cdot v^{-1/2} + C_d$$

After Linear fitted the areal capacitance and the reciprocal of square root of scan rate (figure S5 (b)), the double layer capacitance can be read as 0.0396 F/cm<sup>2</sup>. Subtraction of double layer capacitance from specific capacitance yields the faraday capacitance ( $C_f$ ). The capacitance contribution is evaluated based on the following equations:

$$C_d \% = \frac{C_d}{C_{\tau}} \times 100\%$$

$$C_f \% = \frac{C_f}{C_{\tau}} \times 100\%$$

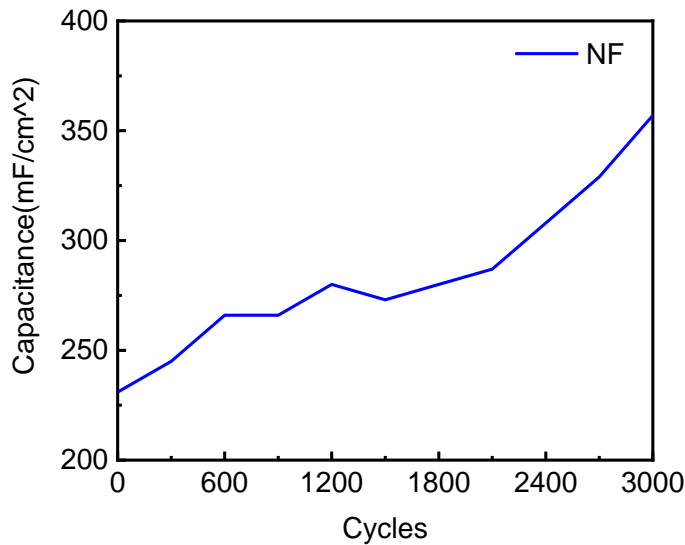

Figure S6 Cycling performance of the single substrate NF under the same charge/discharge current of 0.068 A (10 A/g for the CoS/VG electrode).

## References

1. Z. H. Huang, T. Y. Liu, Y. Song, Y. Li and X. X. Liu, *Nanoscale*, 2017, 9, 13119-13127.
